# Supplementary material for: IRF4 Has a Unique Role in Early B Cell Development and Acts Prior to CD21 Expression to Control Marginal Zone B Cell Numbers
Source: PubMed Central journal article supplement (PMC8645892; doi:10.3389/fimmu.2021.779085), 2021-11-22
Supplement: DataSheet_1.pdf [file DataSheet_1.pdf]

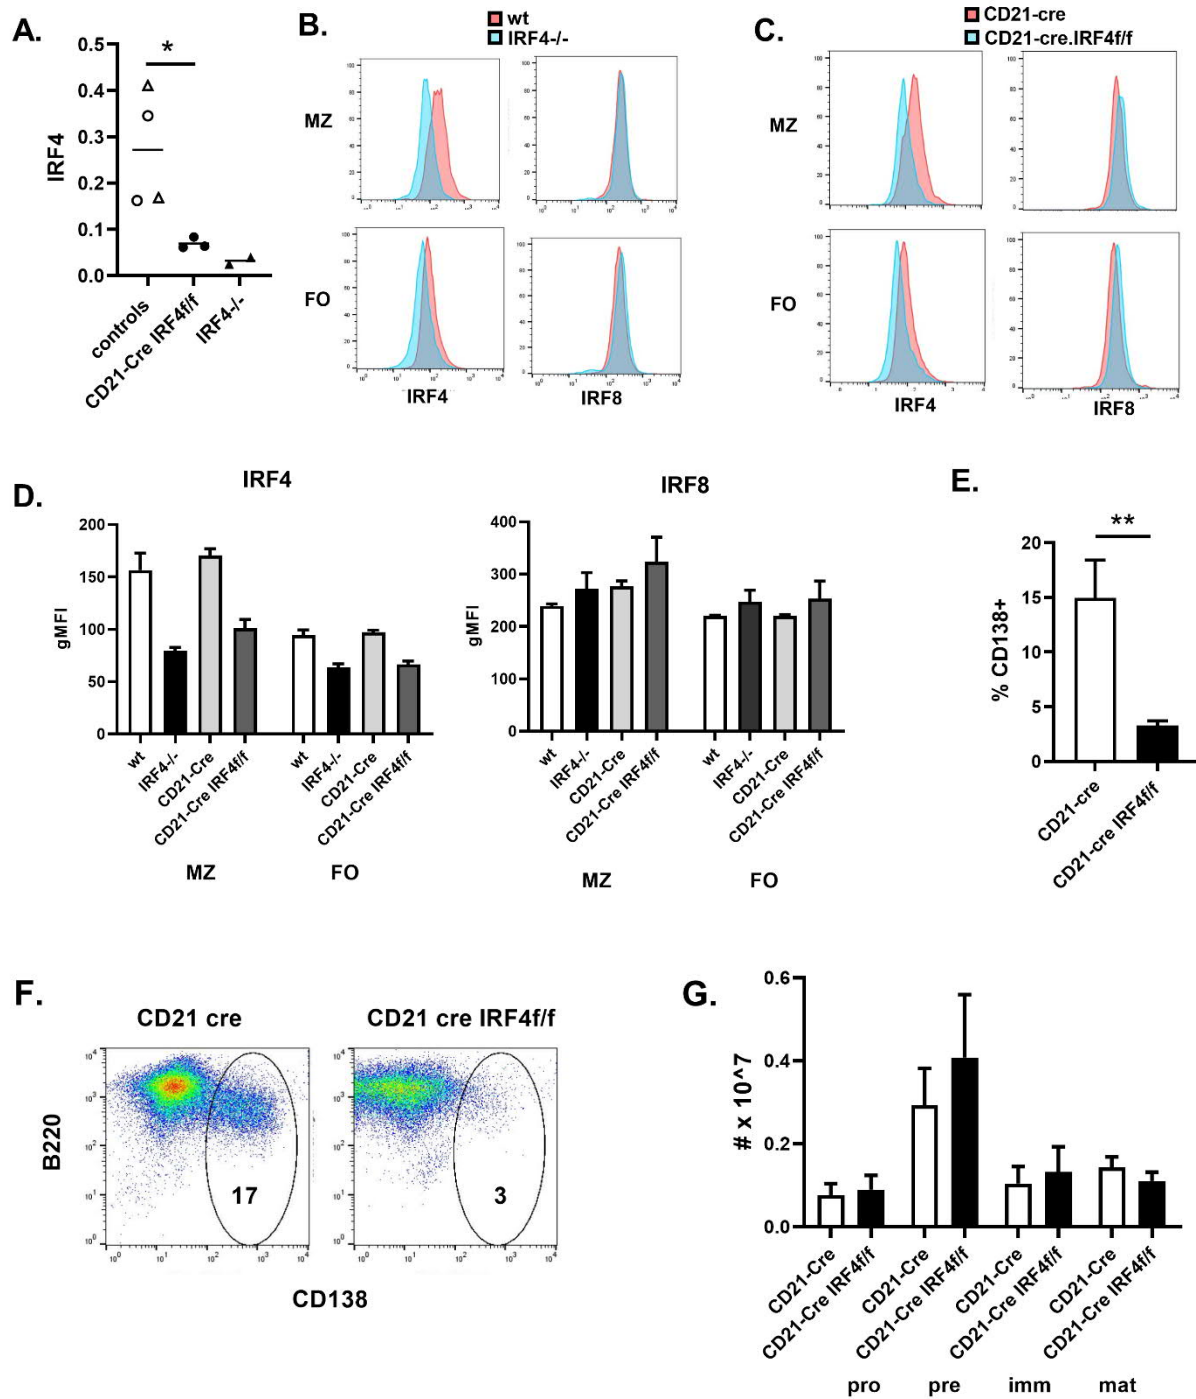

Supplemental Figure 1

A) Real time quantitative PCR of IRF4 levels in purified splenic B cells from mice of the indicated genotypes. Results are normalized to GAPDH. Controls include wild type (open triangles) and CD21-cre (open circles) cells. Each symbol represents an individual mouse. \*p < 0.05 by Student's t-test. B, C) Splenocytes were stained extracellularly with antibodies against CD21 and CD23 and intracellularly with anti-IRF4 or IRF8. IRF4 and IRF8 levels are shown for

MZ (CD21<sup>hi</sup> CD23<sup>lo/-</sup>) and follicular (CD21<sup>+</sup>CD23<sup>+</sup>) B cells. Wild type (red) vs. IRF4-deficient (turquoise) mice are shown in (B), and CD21-cre (red) vs CD21-cre.IRF4f/f (turquoise) mice in (C). D) The gMFI of IRF4 and IRF8 is shown for MZ and FO B cells of the indicated genotypes. Data are shown as mean +/- SD, n = 2. E, F) Purified splenic B cells from mice of the indicated genotypes were stimulated with 5 ug/ml LPS for 72 hours and stained with antibodies against B220 and CD138. The frequency of CD138<sup>+</sup> plasmablasts is indicated in a representative flow cytometry plot (F) and as mean +/- SD for n = 2 CD21-cre and 3 CD21-cre.IRF4f/f (E). \*\*p < 0.01 by Student's t-test. G) The total number of pro, pre, immature, and mature B cells (gated as in Figure 1) in the bone marrow of CD21-cre and CD21-cre.IRF4f/f mice is shown as mean +/- SD, n = 2.
